# Supplementary material for: Peritectic titanium alloys for 3D printing
Source: PubMed Central journal article supplement (PMC6109080; doi:10.1038/s41467-018-05819-9), 2018-08-24
Supplement: 41467_2018_5819_MOESM1_ESM.pdf [file 41467_2018_5819_MOESM1_ESM.pdf]

## **Peritectic titanium alloys for 3D printing**

Pere Barriobero-Vila<sup>1\*</sup>, Joachim Gussone<sup>1</sup>, Andreas Stark<sup>2</sup>, Norbert Schell<sup>2</sup>, Jan Haubrich<sup>1</sup>, Guillermo Requena<sup>1,3</sup>

<sup>1</sup>Institute of Materials Research, German Aerospace Center (DLR), Linder Höhe, 51147 Cologne, Germany

<sup>2</sup>Helmholtz-Zentrum Geesthacht, Max-Planck-Straße 1, 21502 Geesthacht, Germany

<sup>3</sup>Metallic Structures and Materials Systems for Aerospace Engineering, RWTH Aachen University, 52062 Aachen, Germany

\*Correspondence: pere.barrioberovila@dlr.de

This supplementary information contains five supplementary figures (Supplementary Fig. 1, Supplementary Fig. 2, Supplementary Fig. 3, Supplementary Fig. 4 and Supplementary Fig. 5).

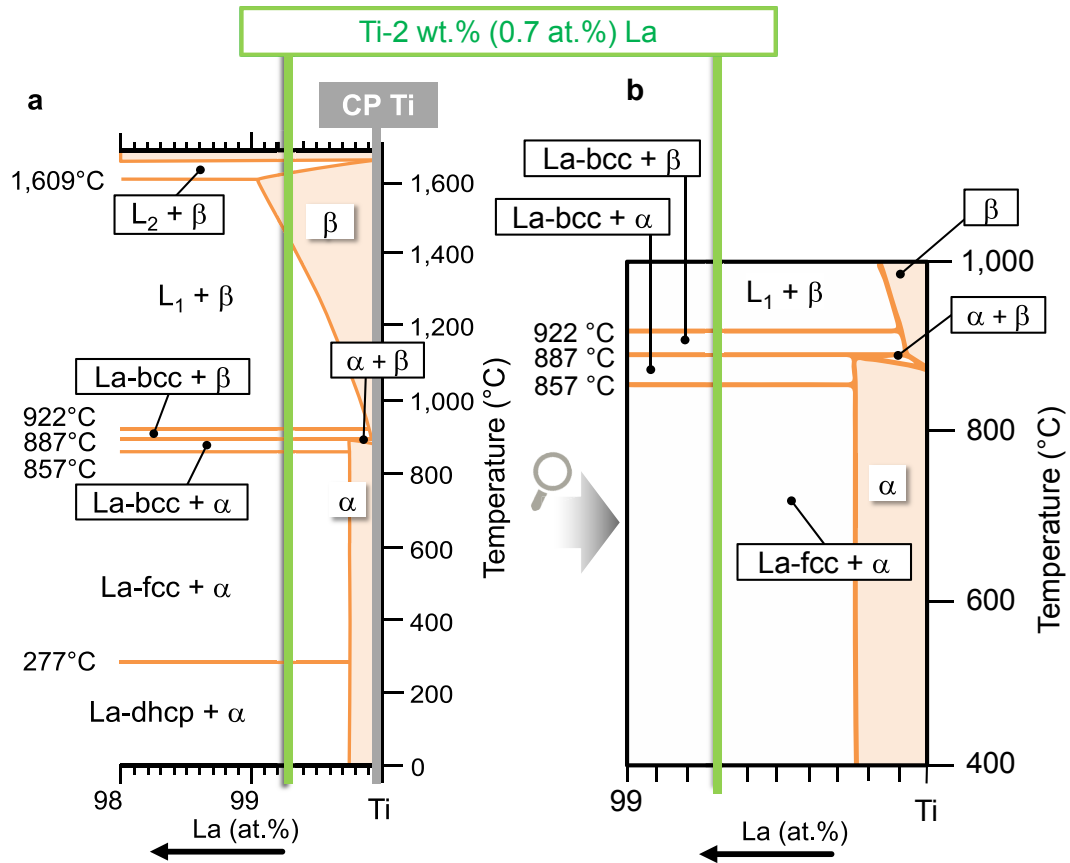

**Supplementary Fig. 1** a Portion the Ti-La phase diagram and **b** magnified detail of the studied region adapted from<sup>1,2</sup>, indicating the compositions used for selective laser melting.

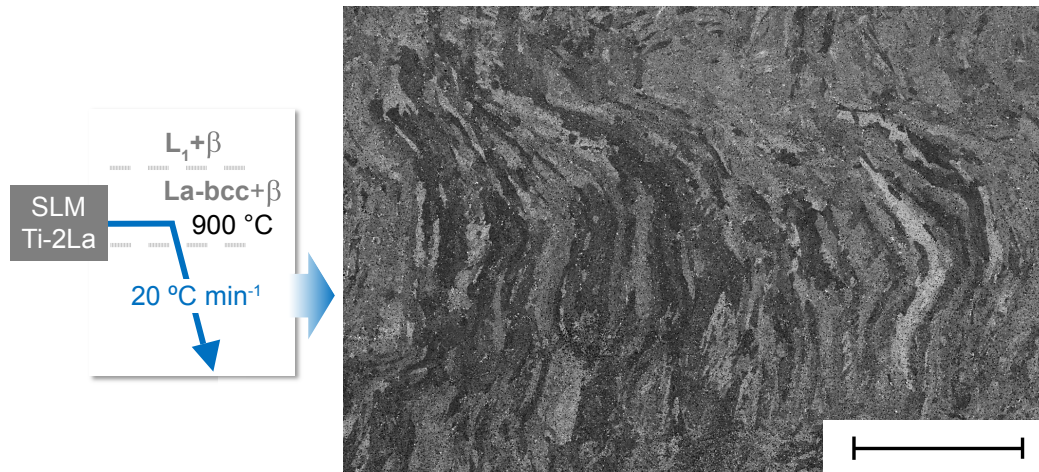

**Supplementary Fig. 2** Post-thermal treatment in  $\text{La-bcc} + \beta$  field of the Ti-2wt.% La (Ti-2La) alloy produced by selective laser melting (SLM). Upon slow cooling of the SLM as-built Ti-2La alloy from  $900\text{ }^\circ\text{C}$  with  $20\text{ }^\circ\text{C min}^{-1}$  (i.e. from the  $\text{La-bcc} + \beta$  field down to room temperature) tortuous grain arrangements from the as-build condition remain in the microstructure, indicating negligible influence of La particles on formation of new  $\alpha$  grains. Scale bar,  $100\text{ }\mu\text{m}$ .

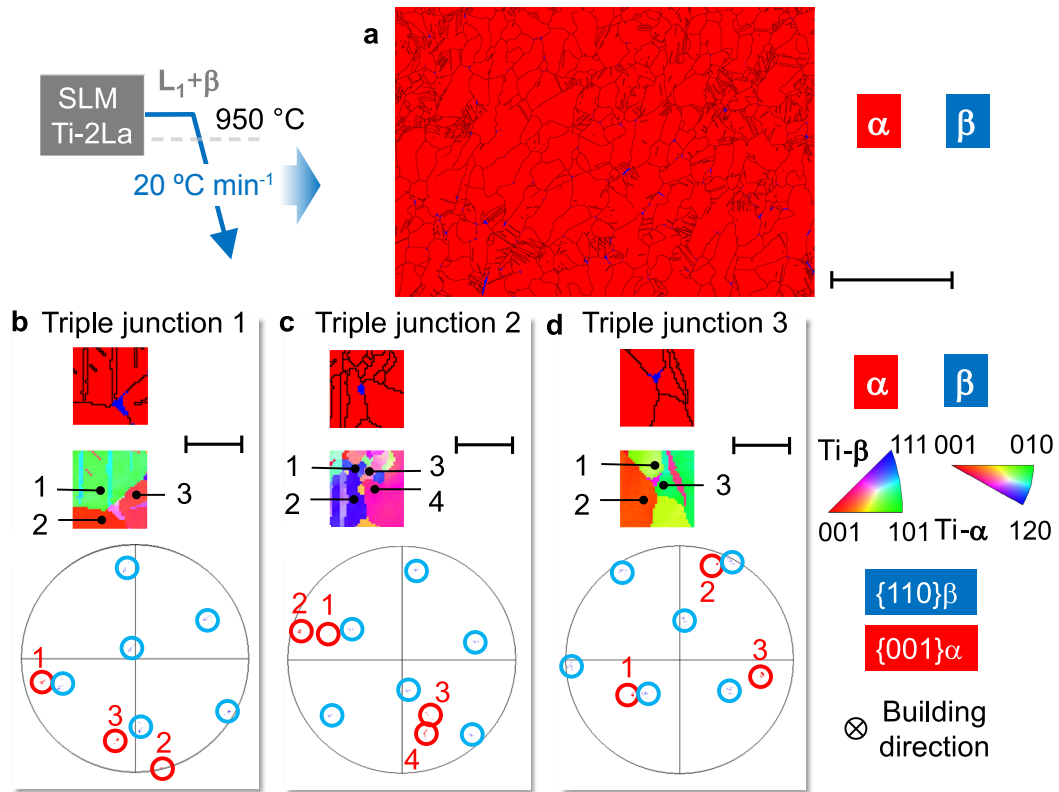

**Supplementary Fig. 3** Post-thermal treatment of the SLM Ti-2La as-built condition via slow cooling with  $20^{\circ}\text{C min}^{-1}$  from  $950^{\circ}\text{C}$  passing through the peritectic line (i.e. from  $L_1+\beta$  field down to room temperature), provokes formation of  $\alpha$  grains and extensive globularization. **a** EBSD phase map for  $\alpha$  and  $\beta$  (in blue and red, respectively). The microstructure mainly consists in  $\alpha$ , though retained  $\beta$  remains in triple junction boundaries ( $\sim 1.4\text{vol.}\%$  according to HEXRD). Scale bar,  $100\mu\text{m}$ . EBSD phase maps from three sub-regions of **a** (**b** triple junction 1, **c** triple junction 2, **d** triple junction 3) are presented with its corresponding IPF maps and pole figures for  $\{110\}\beta$  as well as  $\{001\}\alpha$ . Scale bars,  $10\mu\text{m}$ . The  $\alpha$  variants (encircled in red) surrounding  $\beta$  particles (in blue) do not present a usual Burgers OR  $\{001\}\alpha \parallel \{110\}\beta$ . This reflects the non-Burgers path of  $\alpha$  formation taking place for the heat treated Ti-2La alloy. Black lines in EBSD phase maps of **a**, **b**, **c** and **d** indicate high angle grain boundaries (misorientation  $>10^{\circ}$ ).

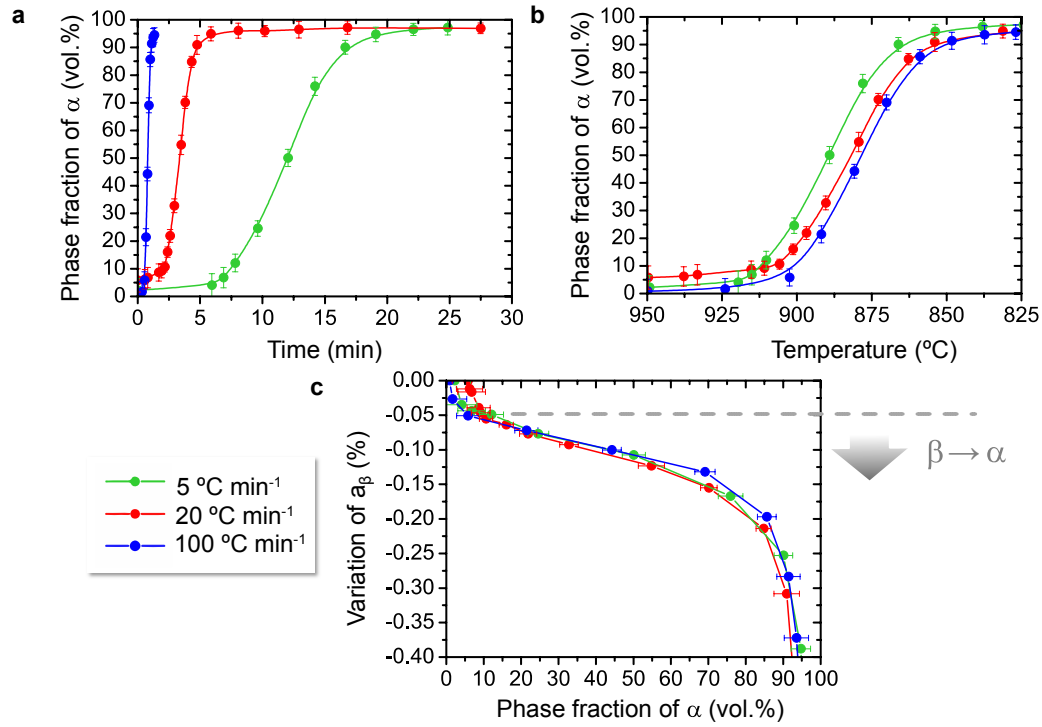

**Supplementary Fig. 4** Crystallization kinetics of  $\alpha$  in the Ti-2wt.% La alloy during continuous cooling. The evolution of volume fractions of  $\alpha$  is presented during  $\beta \rightarrow \alpha$  transformation for 5, 20 and 100  $^{\circ}\text{C min}^{-1}$  as a function of **a** time and **b** temperature. **c** Evolution of the variation of the lattice parameter of  $\beta$ ,  $a_{\beta}$ , during  $\beta \rightarrow \alpha$  transformation as a function of the volume fraction of  $\alpha$  for 5, 20 and 100  $^{\circ}\text{C min}^{-1}$ . The error bars associated with the determination of the lattice parameters are comprised within the symbols.

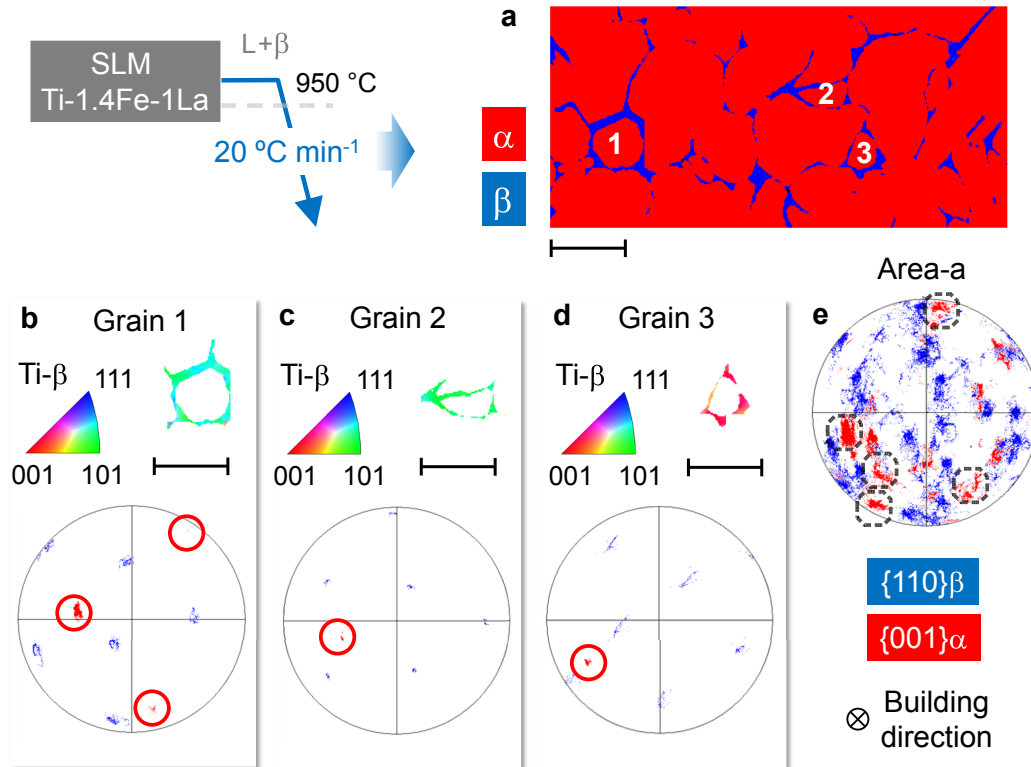

**Supplementary Fig. 5** Post-thermal treatment by slow cooling the Ti-1.4Fe-1La alloy from 950°C with 20°C min<sup>-1</sup> down to room temperature leads to extensive globularization of  $\alpha$ . **a** EBSD phase map for  $\alpha$  and  $\beta$  (in blue and red, respectively). Scale bar, 20 $\mu$ m. IPF maps of  $\beta$  and the corresponding pole figures for  $\{110\}\beta$  as well as  $\{001\}\alpha$  obtained for the  $\alpha$  grains pointed in **a**: **b** Grain 1, **c** Grain 2, **d** Grain 3. Scale bars, 20 $\mu$ m. The  $\alpha$  variants (encircled in red) do not present a usual Burgers OR  $\{001\}\alpha \parallel \{110\}\beta$  with respect to its surrounding  $\beta$  matrix (in blue). This can also be observed when considering the complete area shown in **a**, where **e** encircled regions of  $\{001\}\alpha$  variants (in red) do not match those of  $\{110\}\beta$  (in blue). This reflects the non-Burgers path of  $\alpha$  formation taking place for the heat treated Ti-1.4Fe-1La alloy.

### Supplementary references

1. Mattern, N. et al. Experimental and thermodynamic assessment of the La-Ti and La-Zr systems. *Calphad* **52**, 8–20 (2016).
2. Okamoto, H. Supplemental literature review of binary phase diagrams: B-Fe, Cr-Zr, Fe-Np, Fe-W, Fe-Zn, Ge-Ni, La-Sn, La-Ti, La-Zr, Li-Sn, Mn-S, and Nb-Re. *J. Phase Equilib. Diffus.* **37**, 621–634 (2016).
